# Supplementary material for: Innovations and Other Processes as Identifies of Contemporary Trends in the Sustainable Development of SMEs: The Case of Emerging Regional Economies
Source: Preprints.org preprint supplement (doi:10.20944/preprints201803.0260.v1), 2018-03-30
Supplement: Supplementary file 1 [file supplementary]

|                                                                                                                                                                                                                                  |                                                                                                                                                                                                         |
|----------------------------------------------------------------------------------------------------------------------------------------------------------------------------------------------------------------------------------|---------------------------------------------------------------------------------------------------------------------------------------------------------------------------------------------------------|
| <b>Questions: Innovations and Other Processes...</b>                                                                                                                                                                             | Q7_ Outside organization auditing existing TQM                                                                                                                                                          |
| <b>1. The company is an enterprise:</b>                                                                                                                                                                                          | Q7_ Tax Office                                                                                                                                                                                          |
| Q1_micro                                                                                                                                                                                                                         | Q7_ National Labour Inspectorate                                                                                                                                                                        |
| Q1_small                                                                                                                                                                                                                         | Q7_ Social Insurance Institution                                                                                                                                                                        |
| Q1_middle-sized                                                                                                                                                                                                                  | Q7_ Fire Service                                                                                                                                                                                        |
| <b>2. Does the enterprise implemented any management system?</b>                                                                                                                                                                 | Q7_ Other - which? .....                                                                                                                                                                                |
| Q2_ Yes, implemented, non-certified quality management system                                                                                                                                                                    | <b>8. Is it possible to identify any processes occurring in the enterprise? (Any number of responses)</b><br>If yes, please go to question no 9, if no or you do not know, please go to question no 10. |
| Q2_ Yes, implemented, certified quality management system                                                                                                                                                                        | Q8_ Yes, it is                                                                                                                                                                                          |
| Q2_ Yes, implemented, non-certified integrated (ISO 14001) management system                                                                                                                                                     | Q8_ No, it is not                                                                                                                                                                                       |
| Q2_ Yes, implemented, certified integrated (ISO 14001) management system                                                                                                                                                         | Q8_ I do not know                                                                                                                                                                                       |
| Q2_ No                                                                                                                                                                                                                           | <b>9. Which processes are possible to identify in the enterprise? (Any number of responses)</b>                                                                                                         |
| Q2_ I do not know                                                                                                                                                                                                                | Q9_ Cooperation                                                                                                                                                                                         |
| <b>3. Since when (time period) have the enterprises had the pointed system?</b>                                                                                                                                                  | Q9_ Innovation Process                                                                                                                                                                                  |
| Q3_ Yes, since last year                                                                                                                                                                                                         | Q9_ Providing goods                                                                                                                                                                                     |
| Q3_ Yes, since 2-3 years                                                                                                                                                                                                         | Q9_ Accepting goods                                                                                                                                                                                     |
| Q3_ Yes, since 4-5 years                                                                                                                                                                                                         | Q9_ Sell                                                                                                                                                                                                |
| Q3_ Yes, since 6 years or longer                                                                                                                                                                                                 | Q9_ Contact with customers                                                                                                                                                                              |
| Q3_ I do not know                                                                                                                                                                                                                | Q9_ Sustainable development                                                                                                                                                                             |
| <b>4. Has implemented management system existing in the enterprise got any requirements given to the cooperating enterprise(s)?</b><br>If yes, please go to question no 5, if no or you do not know, please go to question no 6. | Q9_ Flow of information                                                                                                                                                                                 |
| Q4_ Yes, it has                                                                                                                                                                                                                  | Q9_ Implemented CSR                                                                                                                                                                                     |
| Q4_ No, it has not                                                                                                                                                                                                               | Q9_ Sending goods                                                                                                                                                                                       |
| Q4_ I do not know                                                                                                                                                                                                                | Q9_ Flow of documentation                                                                                                                                                                               |
| <b>5. Which requirements given to the cooperating enterprise(s)? (Any number of responses)</b>                                                                                                                                   | Q9_ I do not know                                                                                                                                                                                       |
| Q5_ promptness of supplies                                                                                                                                                                                                       | <b>10. Which levels of cooperation are possible to identify in the enterprise? (Any number of responses)</b>                                                                                            |
| Q5_ adapting a management system to enterprise's own standards                                                                                                                                                                   | Q10_ International                                                                                                                                                                                      |
| Q5_ the service performance with the customer                                                                                                                                                                                    | Q10_ National                                                                                                                                                                                           |
| Q5_ the spare parts for delivered products                                                                                                                                                                                       | Q10_ Regional                                                                                                                                                                                           |
| Q5_ the guarantee longer than required under binding laws and regulations                                                                                                                                                        | Q10_ Local                                                                                                                                                                                              |
| Q5_ I do not know                                                                                                                                                                                                                | Q10_ I do not know                                                                                                                                                                                      |
| <b>6. Does the enterprise have control at over the quality of goods given to the customer(s)? (Any number of responses)</b>                                                                                                      | <b>11. Which kinds of innovations are possible to identify in the enterprise? (Any number of responses)</b>                                                                                             |
| Q6_ studying customer satisfaction on the phone                                                                                                                                                                                  | Q11_ Process                                                                                                                                                                                            |
| Q6_ monitoring the amount of customer complaints                                                                                                                                                                                 | Q11_ Product                                                                                                                                                                                            |
| Q6_ monitoring the reasons of customer complaints                                                                                                                                                                                | Q11_ Marketing                                                                                                                                                                                          |
| Q6_ checking (randomly) the quality of goods prepared for sending to the customer                                                                                                                                                | Q11_ Organizational                                                                                                                                                                                     |
| Q6_ I do not know                                                                                                                                                                                                                | Q11_ I do not know                                                                                                                                                                                      |

|                                                                                                                                |                                                |
|--------------------------------------------------------------------------------------------------------------------------------|------------------------------------------------|
| Questions: Innovations and Other Processes...                                                                                  | Q7_ Outside organization auditing existing TQM |
| 7. Whether within three last years the enterprise was controlled (audited) by outside organizations? (Any number of responses) | Thank you for your attendance                  |
